# Supplementary material for: Polymeric one-side conductive Janus separator with preferably oriented pores for enhancing lithium metal battery safety
Source: Royal Society of Chemistry journal article supplement (doi:10.1039/d0ta10073k), 2020-12-23
Supplement: d0ta10073k1.pdf [file d0ta10073k1.pdf]

## Supporting Information

# Polymeric One-side Conductive Janus Separator with Preferably Oriented Pores for Enhancing Lithium Metal Battery Safety

*Lulu Xu<sup>a</sup>, Xiu Yun Daphne Ma<sup>a</sup>, Wei Wang<sup>b</sup>, Jian Liu<sup>a</sup>, Zhe Wang<sup>a</sup>, Xuehong Lu<sup>a</sup> \**

<sup>a</sup> School of Materials Science and Engineering, Nanyang Technological University, 50 Nanyang Avenue, Singapore 639798, Singapore.

<sup>b</sup> School of Mechanical & Manufacturing Engineering, University of New South Wales, Sydney, 2052, Australia.

### AUTHOR INFORMATION

#### Corresponding Author

**\* Xuehong Lu: [asxhlu@ntu.edu.sg](mailto:asxhlu@ntu.edu.sg)**

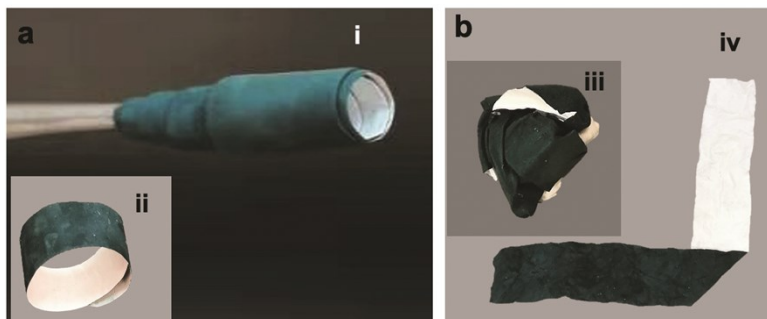

**Figure S1.** Digital photos of (a) rolled O-PVA-PANI tapes, showing their good flexibility and stiffness, (b) a piece of crumpled O-PVA-PANI ribbon, and the same ribbon after removing the crumples.

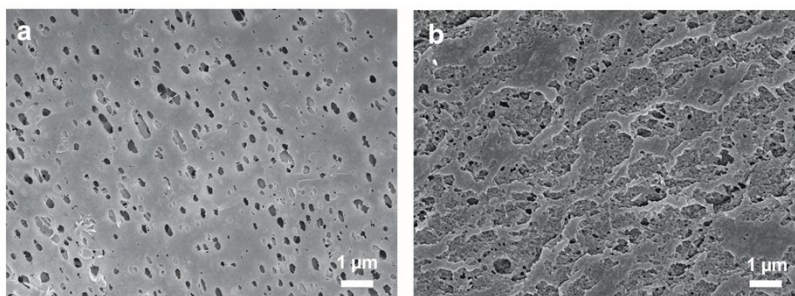

**Figure S2.** SEM images showing surface morphologies of (a) PVA side and (b) PANI side of the R-PVA-PANI separator.

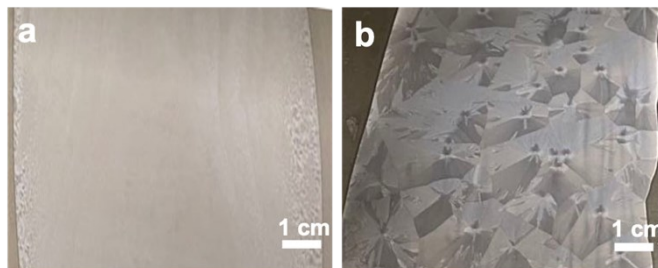

**Figure S3.** Optical images of the PVA gel layers frozen by (a) contacting with liquid nitrogen at the bottom of the layer (directional freezing) (b) placing it in a refrigerator.

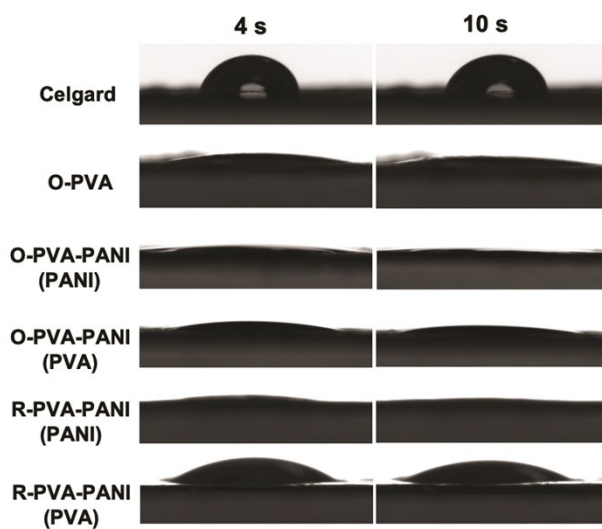

**Figure S4.** Contact Angle of electrolyte (1 M  $\text{LiPF}_6/\text{EC}:\text{DMC}$  1:1 v/v) drop on Celgard separator, O-PVA separator O-PVA-PANI separator and R-PVA-PANI separator at 4s and 10s after dripping. The operation temperature is 25 °C.

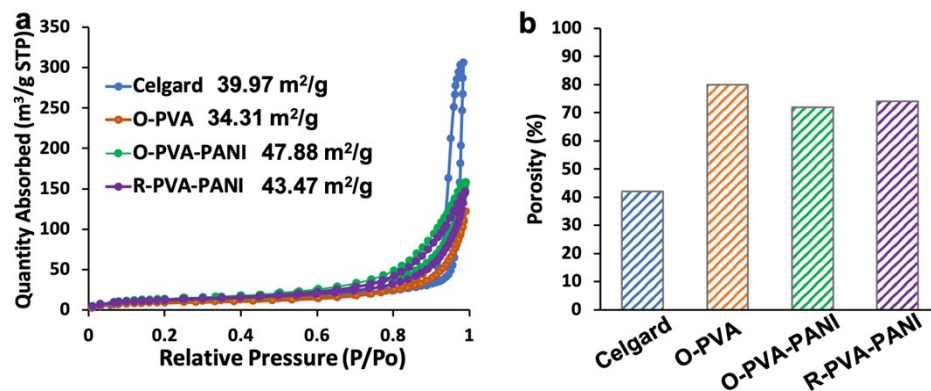

**Figure S5.** Brunauer–Emmett–Teller (BET) surface areas (a) and the porosities (b) of different separators.

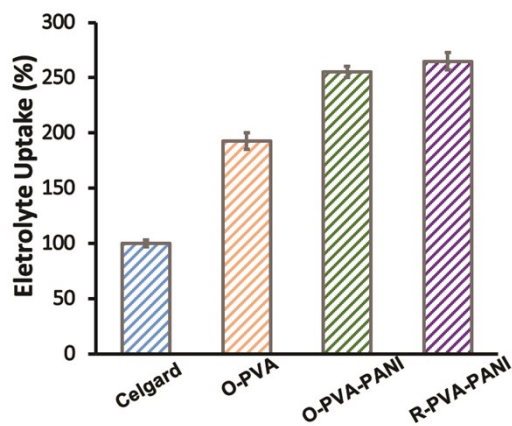

**Figure S6.** The electrolyte uptake (%) values of the separators.

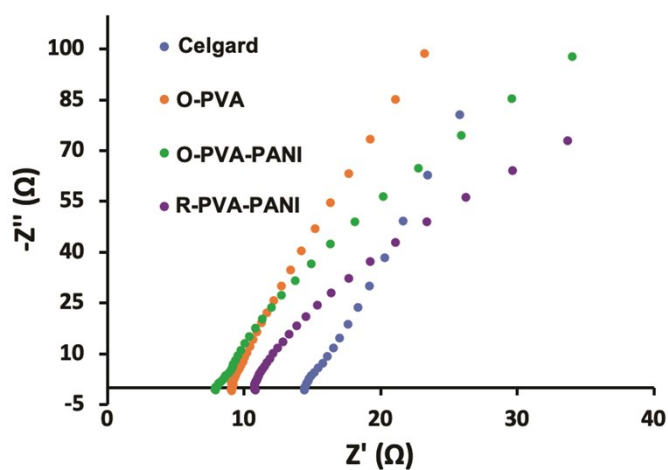

**Figure S7.** Nyquist plots of different separators by using a Steel|Separators|Steel system. The spectra were recorded over a frequency range from 0.01 Hz to 1 MHz.

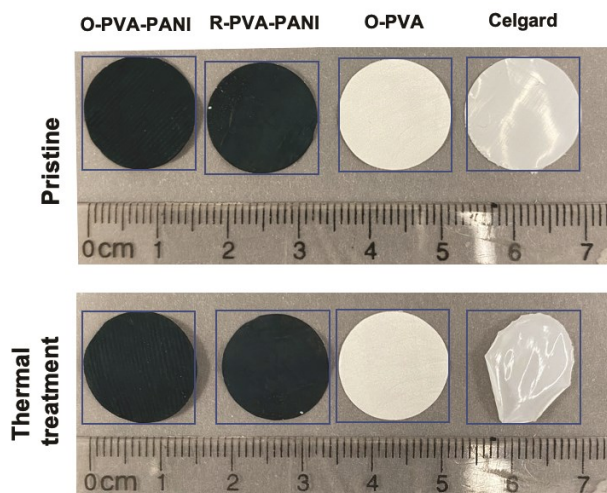

**Figure S8.** Thermal shrinkage of separators before and after thermal treatment in oven at a 160 °C for 1 h. The side length of the square frame is 16 mm.

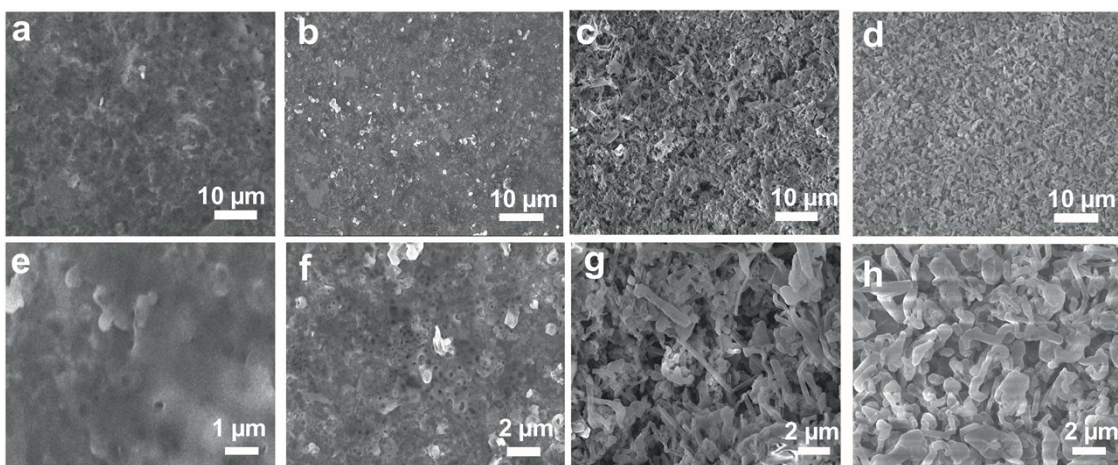

**Figure S9.** SEM images of Li deposition on the copper substrate of the Li||Cu cells with (a, e) O-PVA-PANI separator (b, f) R-PVA-PANI separator (c, g) O-PVA separator and (d, h) Celgard separator. The Li dripping/stripping process is conducted at the current density of 1 mA/cm<sup>2</sup>, and the capacity for each Li deposition was set to be 1 mA h/cm<sup>2</sup>.

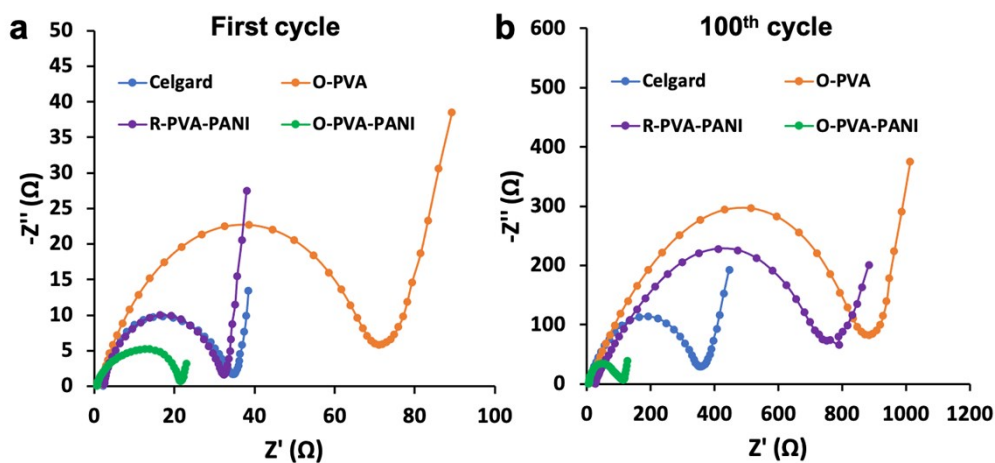

**Figure S10.** Impedance spectra of Li||LiFePO<sub>4</sub> cells with different separators at first cycle (a) and 100<sup>th</sup> cycle (b).
